# Supplementary material
Source: PubMed Central journal article supplement (PMC9900338)
Supplement: EMBR-24-e51800-s001.pdf [file EMBR-24-e51800-s001.pdf]

# **Regulation of cGAS activity by RNA-modulated phase separation**

Silian Chen, Miao Rong, Yun Lv, Deyu Zhu, Ye Xiang

## **CONTENT**

Appendix Figure S1.....page 2-3

Appendix Figure S2.....page 4-5

Appendix Figure S3.....page 6-7

Appendix Figure S4.....page 8-9

Appendix Figure S5.....page 10-11

Appendix Figure S6.....page 12-13

Appendix Figure S7.....page 14-15

Appendix Figure S8.....page 16-17

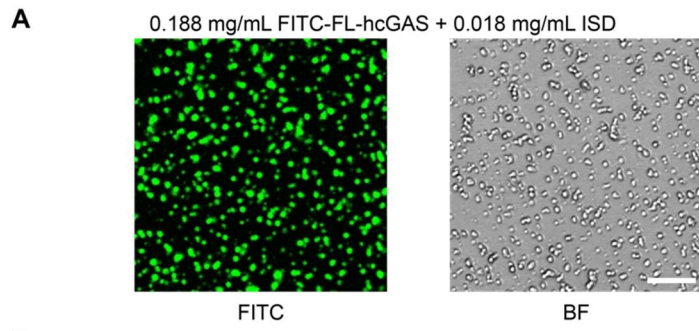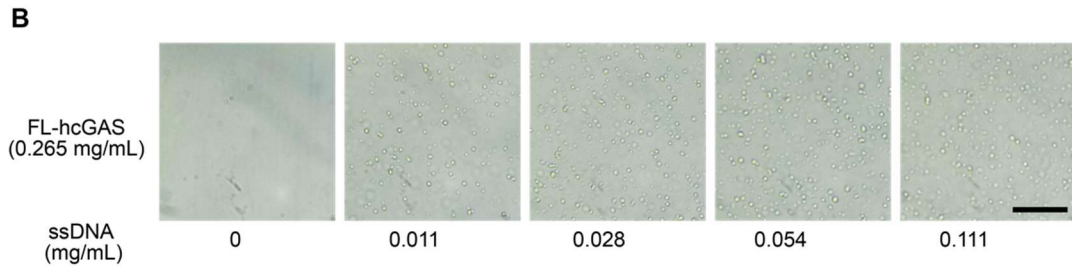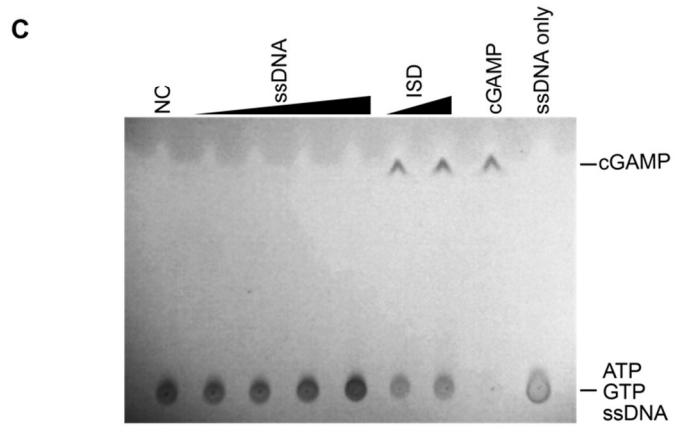



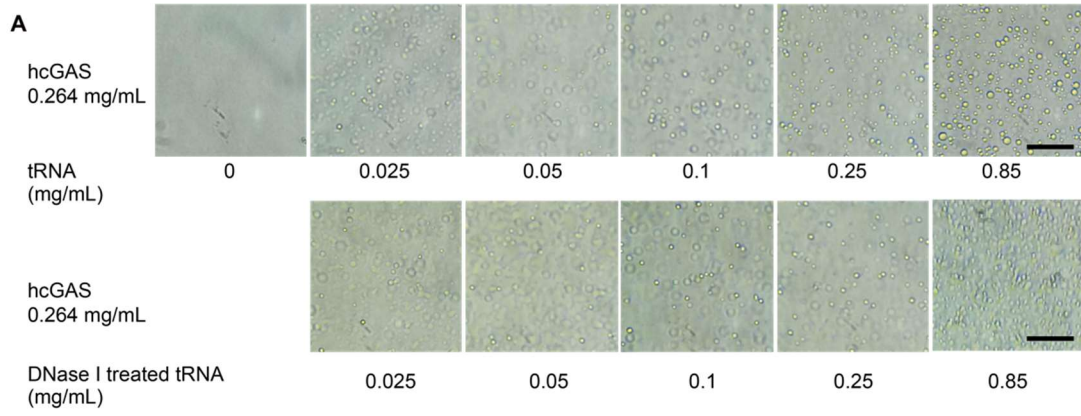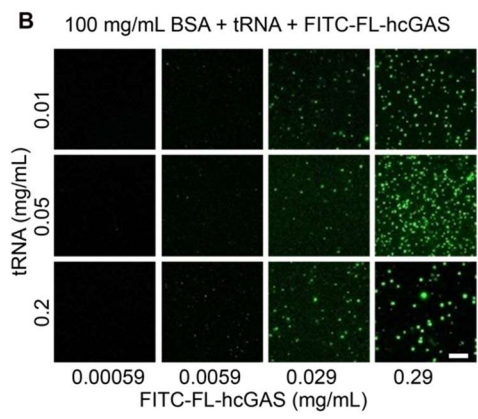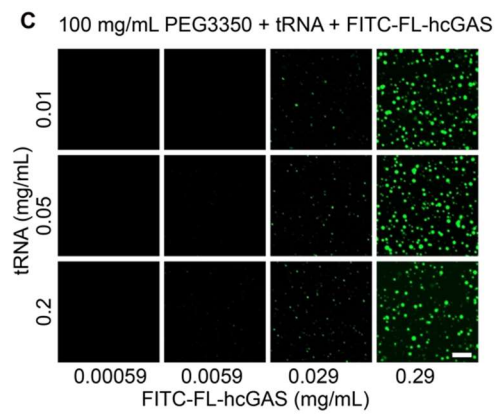

**Appendix Figure S2. RNA mediated phase separation of cGAS.**

**A.** Upper: Bright field photographs of samples of FL-hcGAS (0.264 mg/mL) and yeast tRNA at the indicated concentrations (n=2, biological replicates, data from one representative independent biological replicate are shown). Lower: Bright field photographs of samples of FL-hcGAS (0.264 mg/mL) and DNase I-treated yeast tRNA at the indicated concentrations (n=2, biological replicates, data from one representative independent biological replicate are shown). The scale bars represent 40  $\mu\text{m}$ .

**B and C.** Fluorescence images of FITC-labeled FL-hcGAS and yeast tRNA in presence of 100 mg/mL **B)** BSA or **C)** PEG3350 (n=2, biological replicates, data from one representative independent biological replicate are shown). Samples were prepared in 20 mM HEPES at pH 7.5 and 150 mM NaCl. The scale bars represent 20  $\mu\text{m}$ .

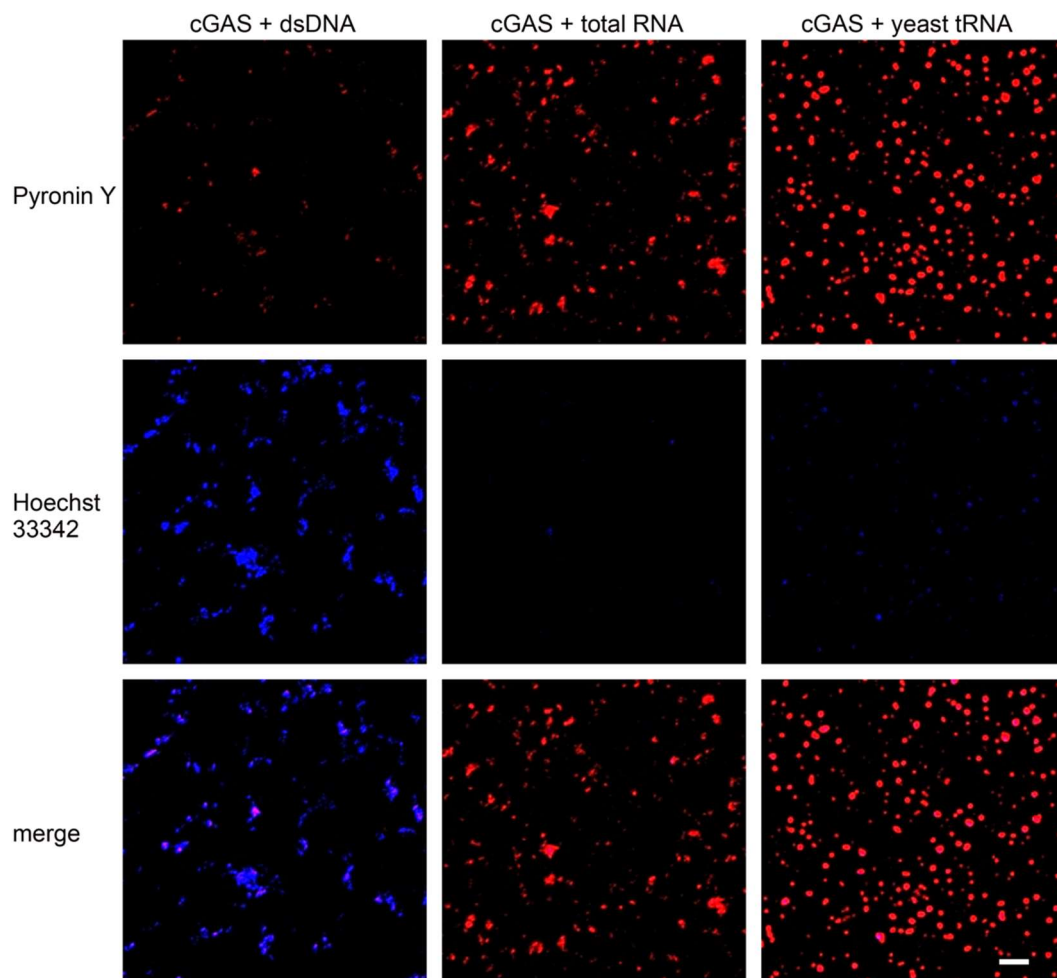

**Appendix Figure S3. Differential staining of dsDNA and RNA in the cGAS involved phase separations by Hoechst 33342 and pyronin Y.** Confocal microscopy images of FL-hcGAS incubated with 55-bp dsDNA, extracted total RNA from HeLa cells, or yeast tRNA and stained with 2  $\mu\text{g}/\text{mL}$  Hoechst 33342 and 4  $\mu\text{g}/\text{mL}$  pyronin Y (n=2, biological replicates, data from one representative independent biological replicate are shown). The concentration of FL-hcGAS was 0.2 mg/mL. The concentrations of 55-bp dsDNA, total RNA and yeast tRNA were all 0.1 mg/mL. The scale bar represents 10  $\mu\text{m}$ .

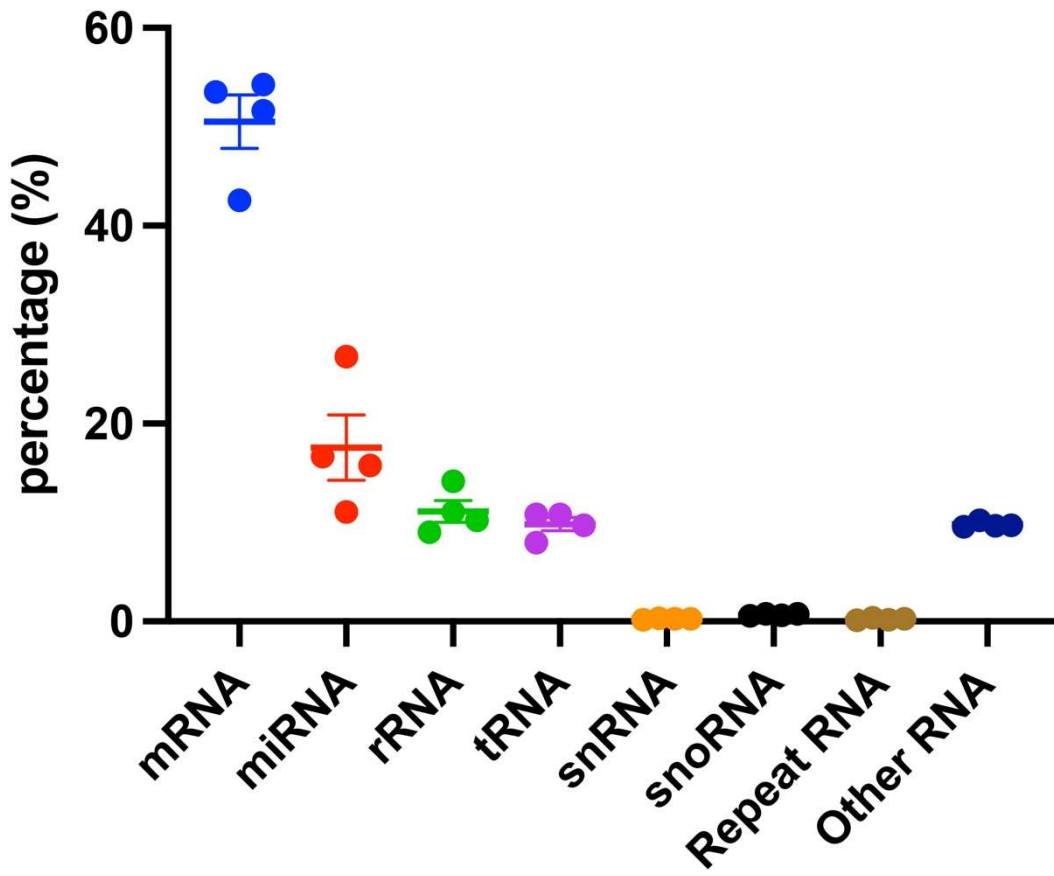



**Appendix Figure S4. RNA sequencing results of the cGAS-containing cytoplasmic fractions from the OptiPrep gradient.** Libraries were generated from band 3 and band 4 of the Opti-prep density gradient (Figure 2H) for RNA sequencing. The preparation of the samples was repeated 2 times. A total of 4 samples were sent for RNA sequencing (n=4, biological replicates). The histograms show the percentage of sequencing reads for different RNA species. Data are presented as means  $\pm$  SEM.

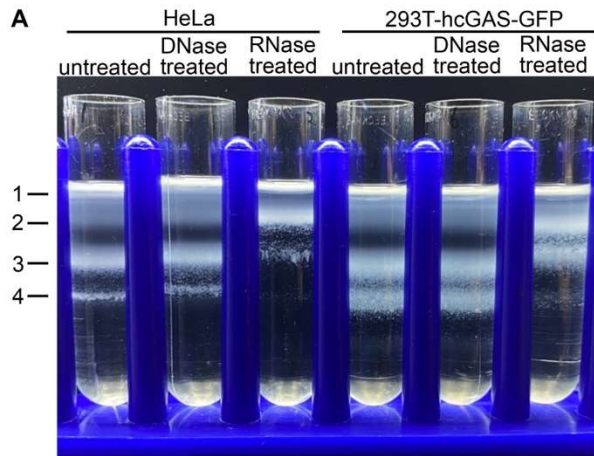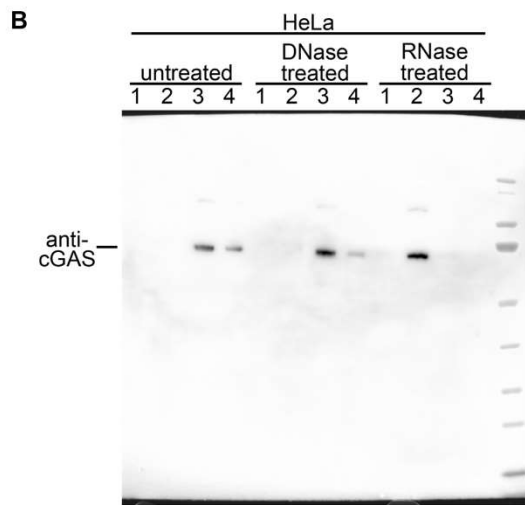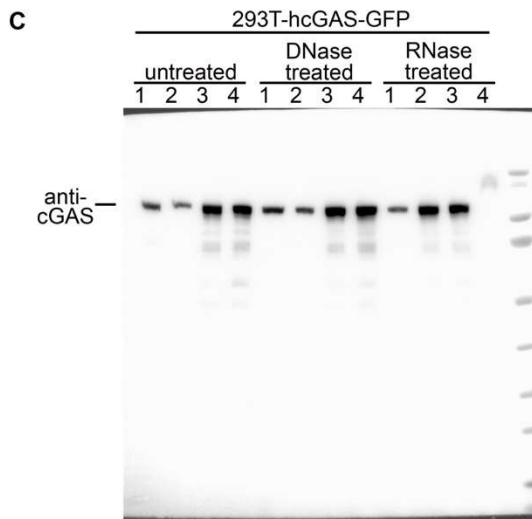

**Appendix Figure S5. OptiPrep density gradient analyses of endogenous cGAS in HeLa cells and the overexpressed cGAS-GFP in HEK293T cells.**

**A.** Opti-prep density gradient analyses of the HeLa cell cytoplasmic extracts and the HEK293T-hcGAS-GFP cell cytoplasmic extracts (n=2, biological replicates, data from one representative independent biological replicate are shown).

**B.** Western blot analysis of the OptiPrep gradient fractions from the HeLa cell cytoplasmic extracts with or without DNase and RNase treatments (n=2, biological replicates, data from one representative independent biological replicate are shown).

**C.** Western blot analysis of the OptiPrep gradient fractions from the HEK293T-hcGAS-GFP cell cytoplasmic extracts with or without DNase and RNase treatments (n=2, biological replicates, data from one representative independent biological replicate are shown).

### Cy5-ISD transfection

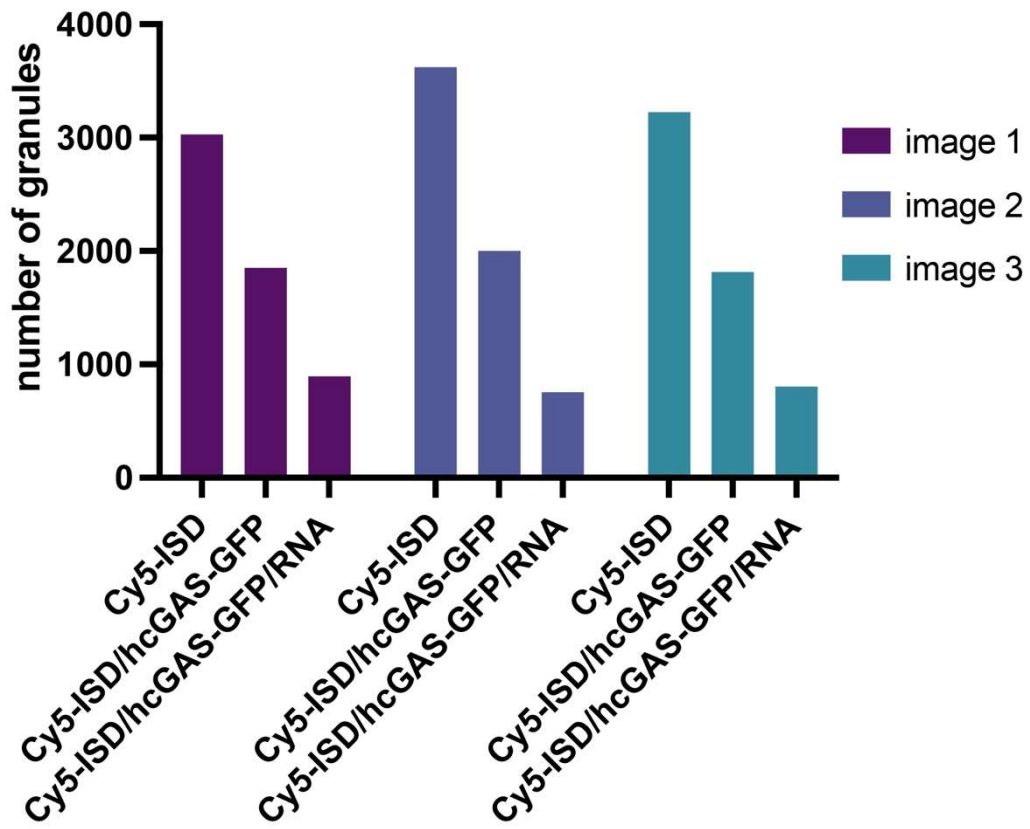

**Appendix Figure S6. Statistics for the number of the granules with colocalized Cy5-ISD and hcGAS-GFP or Cy5-ISD, hcGAS-GFP and RNA (related to Fig 3B).** Granules from 3 raw photographs that have approximately 50 cells per photograph were used for the statistics.

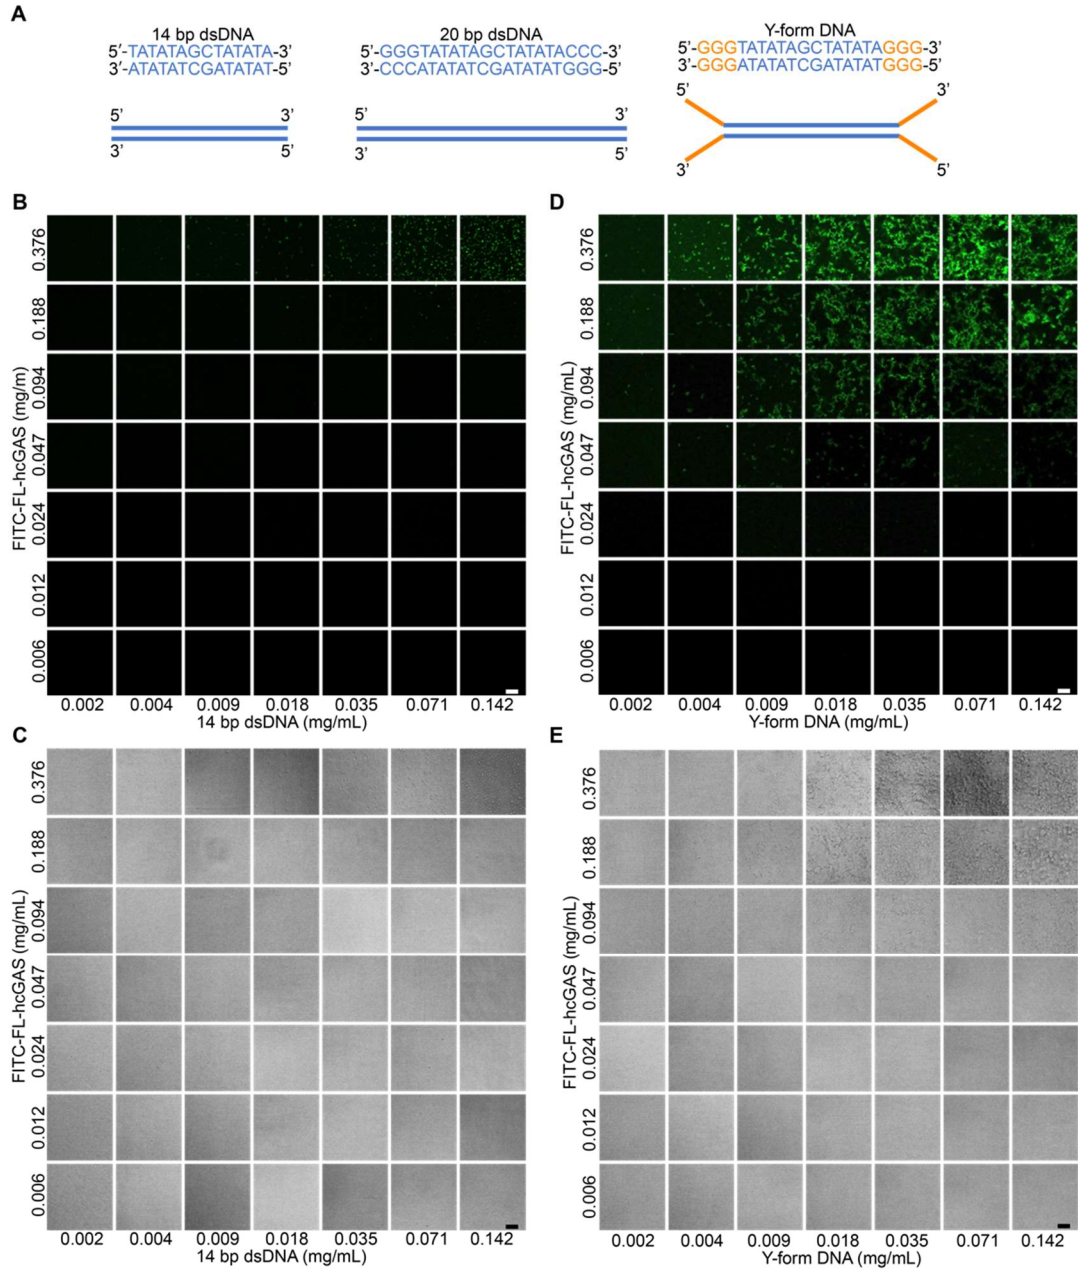

**Appendix Figure S7. Y-form DNA mediated phase separation of FL-hcGAS.**

**A.** Sequences and structures of the 14-bp dsDNA, 20-bp dsDNA and Y-form DNA.

**B and C.** Phase diagrams of FITC-FL-hcGAS and the 14-bp dsDNA (n=2, biological replicates, data from one representative independent biological replicate are shown). **B)** Fluorescence photographs. **C)** Bright field photographs. The scale bars represent 20  $\mu\text{m}$ .

**D and E.** Phase diagrams of FITC-FL-hcGAS and the Y-form DNA (n=2, biological replicates, data from one representative independent biological replicate are shown). **D)** Fluorescence photographs. **E)** Bright field photographs. The scale bars represent 20  $\mu\text{m}$ .

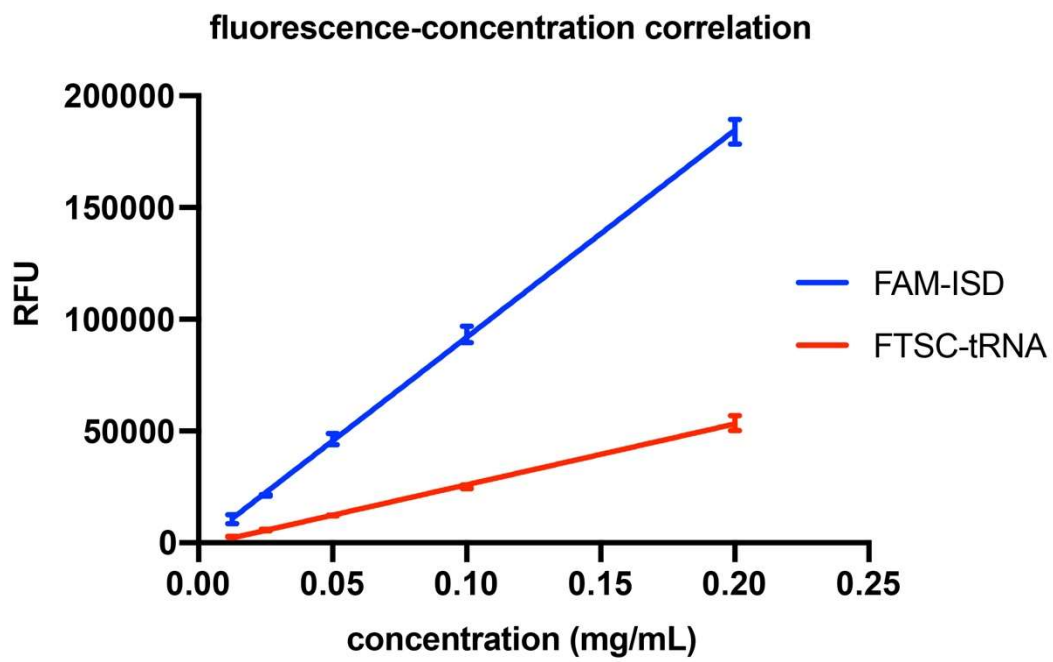



**Appendix Figure S8. Linear correlation between the concentrations and the fluorescence signals (RFUs) of the fluorophore-labeled ISD and tRNA.** Data are presented as mean  $\pm$  SD (n=3, technical replicates).
